# Supplementary material
Source: publisher figshare collection journal article supplement (https://frontiersin.figshare.com/ndownloader/files/24315650)
Supplement: Supplementary file [file 24315650]

**A**

|                     |                                                                  |     |
|---------------------|------------------------------------------------------------------|-----|
| Vd-LRNA_Kauai_long  | TTGGATTGTGTGATCCAAC TGACGAGA CAAAAG TTCGAAACCTTCAACCTAGTGTGAGG   | 60  |
| Vd-LRNA_Kauai_short | TTGGATTGTGTGATCCAAC TGATGAGA CAAAAG TTCGAAACCTTCAACCTAGTGTGAGG   | 60  |
|                     | *****                                                            |     |
| Vd-LRNA_Kauai_long  | ACTCTCACTCTCTCGGC TC TCTGC CTGGAACGCTATGCAGCTCTACCGCTCTATTCC TCG | 120 |
| Vd-LRNA_Kauai_short | ACTCTCACTCTCTCGGC TC TCTGC CTGGAACGCTATGCAGCTCTACCGCTCTATTCC TCG | 120 |
|                     | *****                                                            |     |
| Vd-LRNA_Kauai_long  | ACTAGTTCTTGGAGTATCAAGGAGTTCCATAC TCTCC TAGTAGAGTTTCGGTGACGGCCA   | 180 |
| Vd-LRNA_Kauai_short | ACTAGTTCTTGGAGTATCG-GG GAGTTCCATTCTCC TAGTAAAGTTTCGGTGACGGCCA    | 179 |
|                     | *****                                                            |     |
| Vd-LRNA_Kauai_long  | GGGTAGTAGCAC TTTTGT TTGTAGAAGTTTCGTCC TTTTGGACTCATCAGTAGGAAAACAC | 240 |
| Vd-LRNA_Kauai_short | GGGTAGTAGCAC TTTTGT TT---GAAGTTTCGTCC TTTTGGACTCATCAGTAGGAAAACAC | 236 |
|                     | *****                                                            |     |
| Vd-LRNA_Kauai_long  | ATTCCTAGACTTCTGGTAGGTC TATACCATAGAA TTTGAAAC TTAACACTGGTG TGTCAA | 300 |
| Vd-LRNA_Kauai_short | ATTCCTAGACTTCTGGTAGGTC TATACCATAGAA TTTGAAAC TTAACACTGGTG TGTCAA | 284 |
|                     | *****                                                            |     |
| Vd-LRNA_Kauai_long  | G--GATCCACGCTCTCTC-CCATCTT TACGCGTTCGTTCTGACGAAGAAGTCTGGTGAGTT   | 357 |
| Vd-LRNA_Kauai_short | TGCTATGAATATCTCAATCAATTCATAGGTATA---CTGGACGA-----GTGCGGAGTT      | 335 |
|                     | *****                                                            |     |
| VL RNA_Kauai_long   | GTGTTCTATGACGAAACCGACCTTCTGAAGGTA                                | 390 |
| Vd-LRNA_Kauai_short | -----CCCAATACTCCCCTCTGAAGGTA                                     | 358 |
|                     | *****                                                            |     |

**B**

Fig Vd-LRNA long

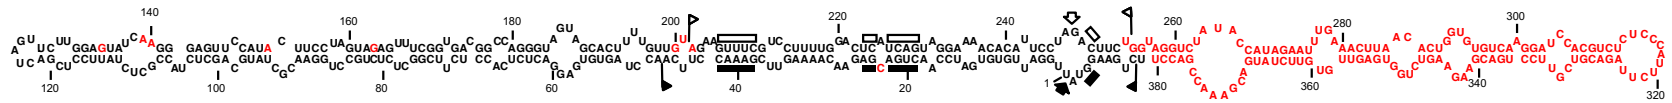

Fig Vd-LRNA short

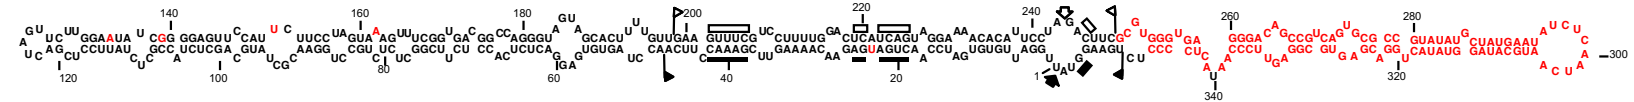

**Figure S2. (A)** Pairwise comparison between a short and a long viroid-like RNA (Vd-LRNA) identified *in silico* in a fig sample from the island of Kauai. Positions with identical nucleotides are denoted by asterisks. **(B)** Primary and predicted secondary structure of the lowest free energy of the long and short Vd-LRNA variants from Kauai. Differences between both RNA molecules are denoted in red. Regions involved in the formation of (+) and (-) hammerhead structures are delimited by flags; arrows and bars indicate the self-cleavage sites and the nucleotides conserved in most natural hammerhead structures, respectively; filled (black) and open symbols refer to (+) and (-) polarity, respectively.
